# Supplementary material
Source: PubMed Central journal article supplement (PMC6166670)
Supplement: 136058_1_supp_167209_pbprvt.pdf [file 136058_1_supp_167209_pbprvt.pdf]

SUPPLEMENTAL DATA

**Proteomic analysis of NCK1/2 adaptors uncovers paralog-specific interactions that reveal a new role for NCK2 in cell abscission during cytokinesis.**

Kévin Jacquet<sup>1,2,3</sup>, Sara L. Banerjee<sup>1,2,3</sup>, François J. M. Chartier<sup>1,2,3</sup>, Sabine Elowe<sup>2,3,4,5</sup>, Nicolas Bisson<sup>1,2,3,6\*</sup>

<sup>1</sup> Centre de recherche du Centre Hospitalier Universitaire (CHU) de Québec-Université Laval, Axe Oncologie, Québec, QC, Canada

<sup>2</sup> Centre de recherche sur le cancer de l'Université Laval, Québec, QC, Canada

<sup>3</sup> PROTEO-Quebec Network for Research on Protein Function, Engineering, and Applications

<sup>4</sup> Centre de recherche du Centre Hospitalier Universitaire (CHU) de Québec-Université Laval, Axe Reproduction, santé de la mère et de l'enfant, Québec, QC, Canada

<sup>5</sup> Department of Pediatrics, Université Laval, Québec, QC, Canada.

<sup>6</sup> Department of Molecular Biology, Medical Biochemistry and Pathology, Université Laval, Québec, QC, Canada.

\* To whom correspondence should be addressed ([nick.bisson@crchudequebec.ulaval.ca](mailto:nick.bisson@crchudequebec.ulaval.ca))

RUNNING TITLE: NCK2 but not NCK1 is required for cytokinesis

## Contents

**Figure S1:** Validation of the expression and localisation of Flag-NCK1/2 or Flag-BirA\*-NCK1/2 in HEK293T cells.

**Figure S2:** NCK2-depleted 293T cells are multi-nucleated and display long protrusions.

**Figure S3:** Cytokinesis delay and abscission failure in *Nck2*<sup>-/-</sup> cells.

**Figure S4:** NCK2-depleted 293T cells fail to complete abscission.

**Figure S5:** ECT2 cytokinesis localization is altered in *Nck2*<sup>-/-</sup> cells.

**Table S1:** List of AP-MS and BioID experiments, controls and sample files (Excel document).

**Table S2:** AP-MS: identified peptides and proteins (Excel document).

**Table S3:** BioID: identified peptides and proteins (Excel document).

**Data availability:** The mass spectrometry proteomics data have been deposited to the ProteomeXchange Consortium via the PRIDE partner repository, with the dataset identifier PXD008824.

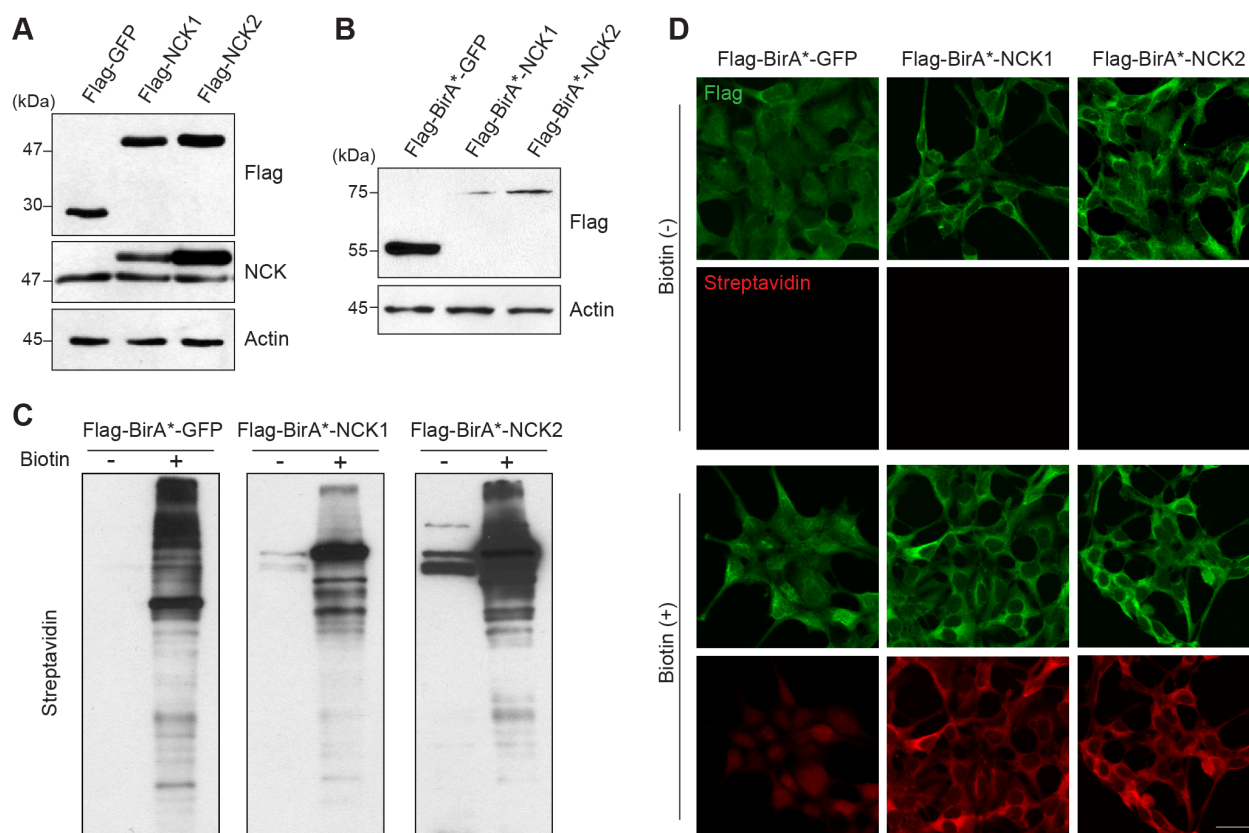

**Figure S1. Validation of the expression and localisation of Flag-NCK1/2 or Flag-BirA\*-NCK1/2 in HEK293 cells.**

(A) HEK293T cells stably expressing Flag-GFP (control), Flag-NCK1 or Flag-NCK2 were analyzed by Western blotting to compare exogenous Flag-NCK1/2 protein expression to endogenous NCK1/2. (B) Flp-In T-REx HEK293 cells stably expressing Flag-BirA\*-GFP (control), Flag-BirA\*-NCK1 or Flag-BirA\*-NCK2 were analyzed by Western blotting to confirm protein expression. (C) Biotinylation assay to validate BirA\* activity of the GFP and NCK1/2 chimeras. (D) Validation of the subcellular localization and biotinylation activity of the Flag-BirA\* constructs (scale bar: 20  $\mu$ m).

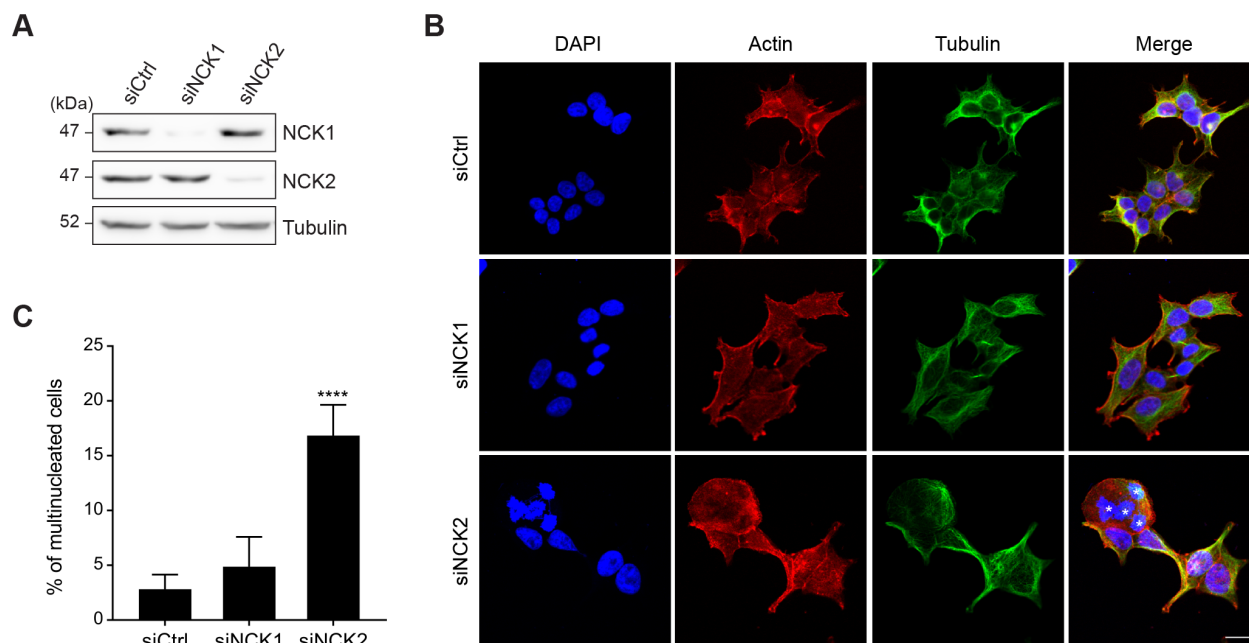

**Figure S2. NCK2-depleted HEK293T cells are multi-nucleated and display long protrusions.**

(A) Endogenous NCK1- and NCK2-depleted 293T cells were analyzed by Western blot to confirm NCK1/2 protein depletion. (B) Control, siNCK1 and siNCK2 transfected 293T cells were analyzed by immunofluorescence for actin (red), tubulin (green) and DAPI (blue) to assess cellular morphology. Multi-nucleation is indicated with asterisks. Representative images are presented (scale bar: 20  $\mu$ m). (C) The penetrance of the multi-nucleation phenotype was calculated for each condition. Mean values and standard deviation from four independent experiments with >90 cells each are presented (siCtrl, n=308; siNCK1, n=435; siNCK1, n=372) (\*\*\*\*  $p \leq 0.0001$ ; Fisher's exact test).

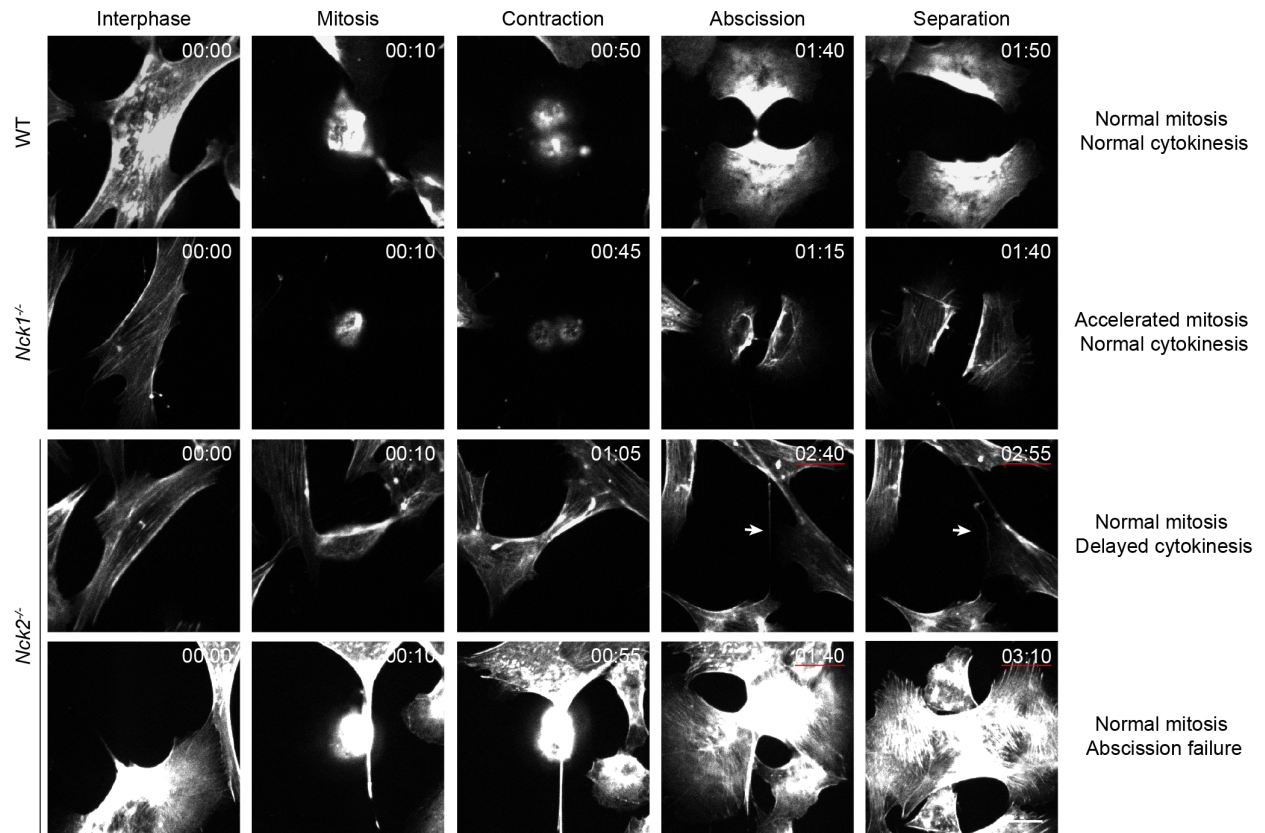

**Figure S3. Cytokinesis delay and abscission failure in *Nck2*<sup>-/-</sup> cells.**

Wild-type, *Nck1*<sup>-/-</sup> and *Nck2*<sup>-/-</sup> MEFs were stained with SIR-ACTIN and analyzed by live imaging. Images were taken every 5 minutes for 24 hours. Representative images from 3 experiments are presented (scale bar: 20  $\mu$ m).

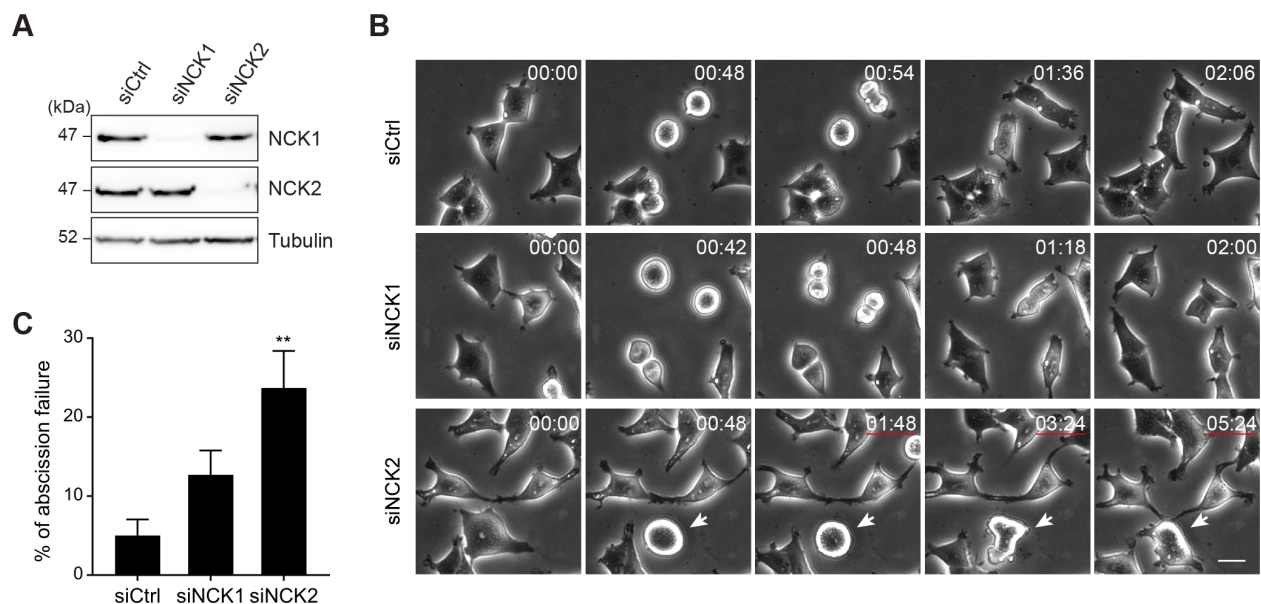

**Figure S4. NCK2-depleted 293T cells fail to complete abscission.**

(A) Endogenous NCK1- and NCK2-depleted 293T cells were analyzed by Western blot to confirm NCK1/2 protein depletion. (B) Control, siNCK1 and siNCK2 transfected 293T cells were analyzed by live cell imaging. Images were taken every 5 minutes for 24 hours. Representative images from 3 experiments are presented (scale bar: 20  $\mu$ m). Abscission failure is indicated with arrows. (C) Average abscission failure was calculated for each condition, from 2 independent experiments with >30 cells each (siCtrl, n=87; siNCK1, n=123; siNCK2, n=119) (\*\* $p \leq 0.01$ ; Fisher's exact test).

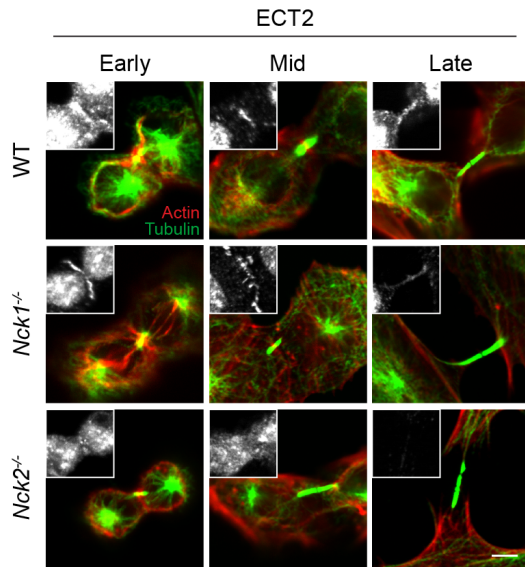

**Figure S5. ECT2 cytokinesis localization is altered in *Nck2*<sup>-/-</sup> cells.**

Wild-type, *Nck1*<sup>-/-</sup> and *Nck2*<sup>-/-</sup> MEFs were fixed at different stages of cytokinesis and analyzed by immunofluorescence for actin (red), tubulin (green), and ECT2 (insert). Representative images from four experiments are shown (scale bar: 5  $\mu$ m).
